# Supplementary material
Source: Elsevier journal article supplement (https://www.sciencedirect.com/science/article/pii/S2255553618301538)
Supplement: mmc1 [file S2255553618301538:mmc1.docx]

**MATERIAL COMPLEMENTAR DO TRABALHO “CRESCIMENTO E SITUAÇÃO DO PESO DE CRIANÇAS BRASILEIRAS COM TRANSTORNOS DO ESPECTRO AUTISTA: UM ESTUDO LONGITUDINAL MISTO”**

1. Modelo bayesiano. O modelo multinível bayesiano utilizado para descrever as alterações nas dimensões corporais por idade cronológica (centrados em 4,1 anos) foi o que segue:

*Yt* ~ Normal(*µt*, *σ*) [probabilidade]

*µt* = *αcrianças*[*t*] + *βk crianças*[*t*] idade central*k* [modelo polinomial]

[população de efeitos variáveis]

[construir matriz de covariância]

*α* ~ Normal(103,1, 50,0) [média *a priori* para modelos de estatura]

*α* ~ Normal(21,0, 50,0) [média *a priori* para modelos de massa corporal]

*α* ~ Normal(18,6, 50,0) [média *a priori* para modelos de IMC]

*βk* ~ Normal(0, 10) [média *a priori* para termos médios de crescimento]

*σ*~ HalfCauchy(0, 2) [desvio padrão *a priori* entre as crianças]

*σα* ~ HalfCauchy(0, 2) [desvio padrão *a priori* entre os interceptos]

*σβ* ~ HalfCauchy(0, 2) [desvio padrão *a priori* entre os termos de crescimento]

R ~ LKJ(1) [*priori* para a matriz de correlação]

*Y* representa a estatura, a massa corporal ou o IMC, *α* representa a estimativa desconhecida do intercepto, *β* representa a estimativa desconhecida de cada um dos termos de crescimento e *k* o grau dos termos polinomiais (1, 2, 3).

**2. Resultados da comparação dos modelos**

Inicialmente examinamos as tendências de alterações das dimensões corporais entre 4 e 15 anos. Adotamos uma forma normal de crescimento para estatura nessa faixa etária observada, descrita por um polinômio cúbico. Contudo, confirmamos essa expectativa ao comparar o modelo polinômio cúbico com os modelos de crescimento linear e crescimento quadrático.

Os códigos foram os que seguem:

h.1 <- brm (h_cm ~ age_cent_4yr + age_cent_4yr_2 + age_cent_4yr_3 + (age_cent_4yr + age_cent_4yr_2 | id),

data = asd, family = gaussian,

prior = c (prior (normal (103.1,50), class = Intercept),

prior (normal (0,10), class = b),

prior (cauchy (0,2), class = sd)),

control = list(adapt_delta = 0.99, max_treedepth = 15))

(Incluímos os efeitos dos grupos até o segundo grau de idade, pois não foi encontrada nenhuma variação substancial para o terceiro grau nos grupos)

h2 <- brm (h_cm ~ age_cent_4yr + age_cent_4yr_2 + (age_cent_4yr + age_cent_4yr_2 | id),

data = asd, family = gaussian,

prior = c (prior (normal (103.1,50), class = Intercept),

prior (normal (0,10), class = b),

prior (cauchy (0,2), class = sd)),

control = list(adapt_delta = 0.99, max_treedepth = 15))

h3 <- brm (h_cm ~ age_cent_4yr + (age_cent_4yr | id),

data = asd, family = gaussian,

prior = c (prior (normal (103.1,50), class = Intercept),

prior (normal (0,10), class = b),

prior (cauchy (0,2), class = sd)),

control = list(adapt_delta = 0.99, max_treedepth = 15))

Com relação à massa corporal e ao IMC, comparamos os modelos de crescimento linear, crescimento quadrático e crescimento cúbico sem nenhuma expectativa *a priori*. Os códigos dos modelos foram os que seguem:

#body mass#

bm1 <- brm (w_kg ~ age_cent_4yr + (age_cent_4yr | id),

data = asd, family = gaussian

prior = c (prior (normal (21,50), class=Intercept),

prior (normal (0,10), class = b),

prior (cauchy(0,2), class = sd)),

control = list (adapt_delta = 0.99, max_treedepth = 15))

bm2 <- brm (w_kg ~ age_cent_4yr + age_cent_4yr_2 + (age_cent_4yr + age_cent_4yr_2 | id),

data = asd, family = gaussian,

prior = c (prior (normal (21,50), class=Intercept),

prior (normal (0,10), class = b),

prior (cauchy(0,2), class = sd)),

control = list (adapt_delta = 0.99, max_treedepth = 15))

bm3 <- brm (w_kg ~ age_cent_4yr + age_cent_4yr_2 + age_cent_4yr_3 + (age_cent_4yr + age_cent_4yr_2 | id),

data = asd, family = gaussian,

prior = c (prior (normal (21,50), class=Intercept),

prior (normal (0,10), class = b),

prior (cauchy(0,2), class = sd)),

control = list (adapt_delta = 0.99, max_treedepth = 15))

(Incluímos os efeitos dos grupos até o segundo grau de idade, pois não foi encontrada nenhuma variação substancial para o terceiro grau nos grupos)

#BMI model#

bmi.1 <- brm (BMI ~ age_cent_4yr + age_cent_4yr_2 + age_cent_4yr_3 + (age_cent_4yr | id),

data = asd,family = gaussian,

prior = c (prior (normal (18.6,50), class=Intercept),

prior (normal (0,10), class = b),

prior (cauchy(0,2), class = sd)),

control = list (adapt_delta = 0.99, max_treedepth = 15))

bmi.2 <- brm (BMI ~ age_cent_4yr + age_cent_4yr_2 + (age_cent_4yr|id),

data = asd, family = gaussian,

prior = c (prior (normal (18.6,50), class=Intercept),

prior (normal (0,10), class = b),

prior (cauchy(0,2), class = sd)),

control = list (adapt_delta = 0.99, max_treedepth = 15))

(Incluímos os efeitos dos grupos somente para a idade linear, pois não foi encontrada nenhuma variação substancial para as outras idades nos grupos)

Utilizamos o critério de informação amplamente aplicável (WAIC) para comparar os modelos. Os resultados da comparação entre os modelos são apresentados na tabela complementar 1.

**Tabela complementar 1 - Valores WAIC que comparam os modelos lineares, quadráticos e cúbicos**

|  | Modelo linear | Modelo polinomial quadrático | Modelo polinomial cúbico |
| --- | --- | --- | --- |
| Estatura | 2173,37 | 2131,65 | 2117,45 |
| Massa corporal | 1806,73 | 1761,25 | 1766,57 |
| IMC | 1670,74 | 1611,44 | 1596,40 |

**3. Códigos do R.** Os códigos utilizados para ajustar os modelos multinível bayesianos na *Stan* foram obtidos utilizando o pacote **brms**. Esse pacote é conveniente para especificar facilmente uma ampla gama de multinível bayesiano para facilmente ajustar os modelos multinível,[1] em grande parte seguindo a fórmula sintaxe do pacote **lme4**.[[2](#_ENREF_2)]

Os seguintes códigos foram utilizados para obter as estimativas para os modelos apresentados na tabela 2. Apresentamos também as informações resumidas de cada modelo, por meio da função **resumo**; *trace-plots* utilizando a função **plot**;[[3](#_ENREF_3)] e gráfico sobreposição de densidade, utilizando a função **pp_check**, para verificação gráfica de predições *a posteriori*.[[4](#_ENREF_4),[5](#_ENREF_5)]

#stature model#

R> h.final <- brm (h_cm ~ age_cent_4yr + age_cent_4yr_2 + age_cent_4yr_3 + (age_cent_4yr + age_cent_4yr_2 | id),

data = asd,

family = gaussian,

prior = c (prior (normal (103.1,50), class = Intercept),

prior (normal (0,10), class = b),

prior (cauchy (0,2), class = sd)),

control = list(adapt_delta = 0.99, max_treedepth = 15))

R>summary(h.final)

Family: gaussian(identity)

Formula: h_cm ~ age_cent_4yr + age_cent_4yr_2 + age_cent_4yr_3 + (age_cent_4yr | id)

Data: asd (Number of observations: 359)

Samples: 4 chains, each with iter = 2000; warmup = 1000; thin = 1;

total post-warmup samples = 4000

ICs: LOO = NA; WAIC = NA; R2 = NA

Group-Level Effects:

~id (Number of levels: 120)

Estimate Est.Error l-95% CI u-95% CI Eff.Sample Rhat

sd(Intercept) 13.00 1.36 10.33 15.80 568 1.02

sd(age_cent_4yr) 0.29 0.19 0.01 0.70 144 1.03

cor(Intercept,age_cent_4yr) 0.41 0.45 -0.73 0.98 2355 1.00

Population-Level Effects:

Estimate Est.Error l-95% CI u-95% CI Eff.Sample Rhat

Intercept 106.91 1.60 103.77 110.14 407 1.01

age_cent_4yr 7.83 0.69 6.45 9.13 2250 1.00

age_cent_4yr_2 -0.65 0.15 -0.94 -0.34 2501 1.00

age_cent_4yr_3 0.03 0.01 0.01 0.05 2991 1.00

Family Specific Parameters:

Estimate Est.Error l-95% CI u-95% CI Eff.Sample Rhat

sigma 3.88 0.19 3.54 4.26 4000 1.00

Samples were drawn using sampling(NUTS). For each parameter, Eff.Sample is a crude measure of effective sample size, and Rhat is the potential scale reduction factor on split chains (at convergence, Rhat = 1).

plot(h.final)


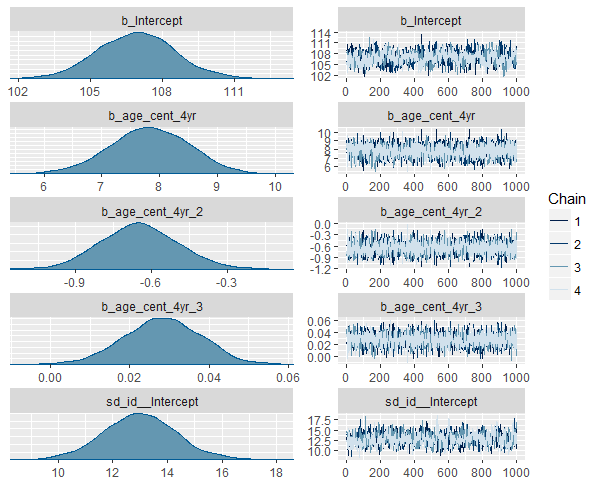


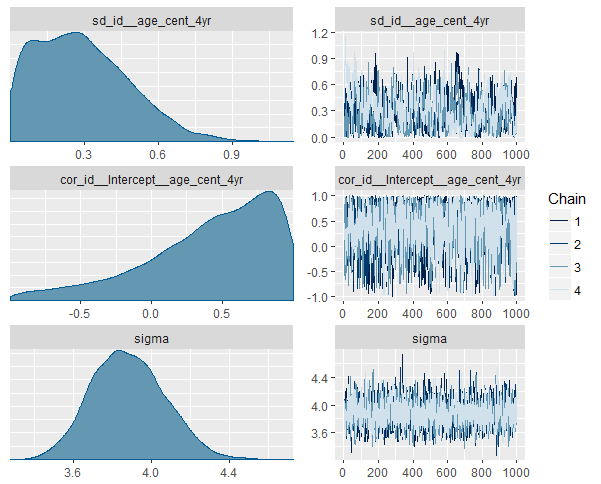


pp_check(h.final)


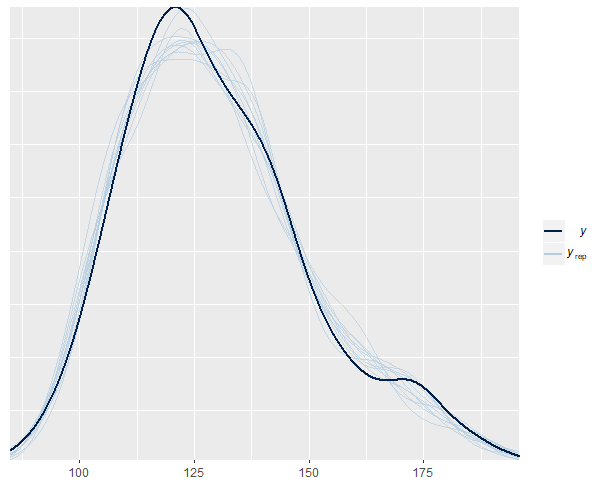


#body mass model#

R> bm.final <- brm (w_kg ~ age_cent_4yr + age_cent_4yr_2 + (age_cent_4yr + R> age_cent_4yr_2 | id) + (1 | antipychotics_cat2),

data = asd,

family = gaussian,

prior = c (prior (normal (21,50), class=Intercept),

prior (normal (0,10), class = b),

prior (cauchy(0,2), class = sd)),

control = list (adapt_delta = 0.99, max_treedepth = 15))

R> summary(bm.final)

Family: gaussian(identity)

Formula: w_kg ~ age_cent_4yr + age_cent_4yr_2 + (age_cent_4yr + age_cent_4yr_2 | id) + (1 | antipychotics_cat2)

Data: asd (Number of observations: 359)

Samples: 4 chains, each with iter = 2000; warmup = 1000; thin = 1;

total post-warmup samples = 4000

ICs: LOO = NA; WAIC = NA; R2 = NA

Group-Level Effects:

~antipychotics_cat2 (Number of levels: 4)

Estimate Est.Error l-95% CI u-95% CI Eff.Sample Rhat

sd(Intercept) 3.02 2.61 0.13 9.42 404 1.00

~id (Number of levels: 120)

Estimate Est.Error l-95% CI u-95% CI Eff.Sample Rhat

sd(Intercept) 16.28 1.46 13.58 19.24 597 1.00

sd(age_cent_4yr) 0.51 0.29 0.03 1.10 436 1.00

sd(age_cent_4yr_2) 0.07 0.02 0.03 0.12 521 1.01

cor(Intercept,age_cent_4yr) 0.52 0.38 -0.48 0.96 1507 1.00

cor(Intercept,age_cent_4yr_2) -0.58 0.23 -0.93 -0.11 534 1.00

cor(age_cent_4yr,age_cent_4yr_2) -0.36 0.42 -0.90 0.69 746 1.00

Population-Level Effects:

Estimate Est.Error l-95% CI u-95% CI Eff.Sample Rhat

Intercept 31.82 2.54 26.41 36.64 485 1.01

age_cent_4yr 0.81 0.27 0.26 1.34 2102 1.00

age_cent_4yr_2 0.03 0.03 -0.03 0.08 2526 1.00

Family Specific Parameters:

Estimate Est.Error l-95% CI u-95% CI Eff.Sample Rhat

sigma 2.18 0.13 1.94 2.47 531 1.00

Samples were drawn using sampling(NUTS). For each parameter, Eff.Sample is a crude measure of effective sample size, and Rhat is the potential scale reduction factor on split chains (at convergence, Rhat = 1).

R>plot(bm.final)
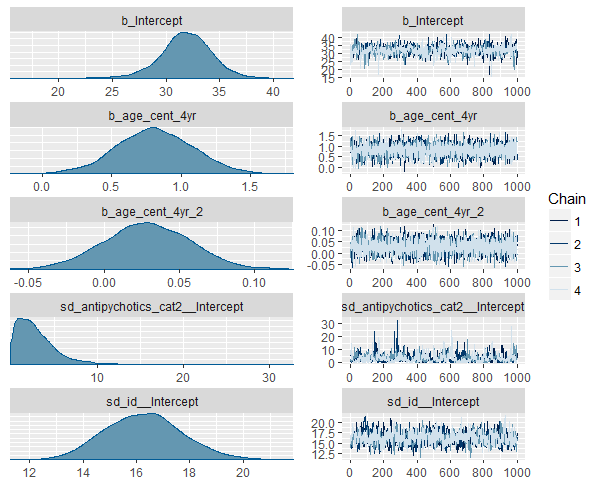

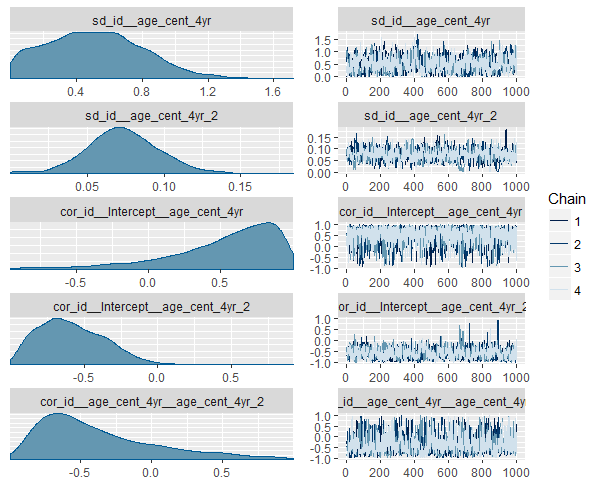

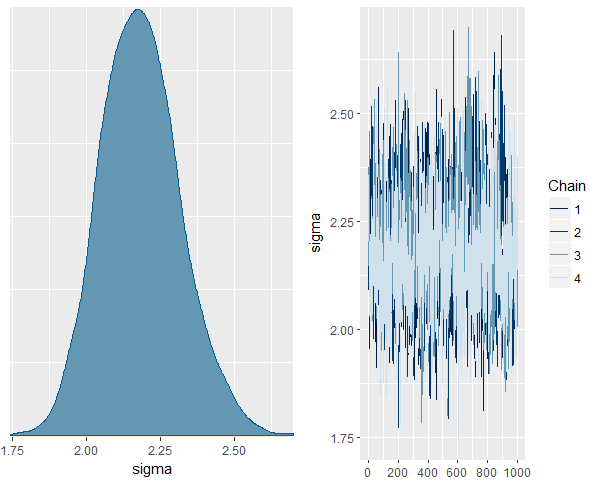


pp_check(bm.final)


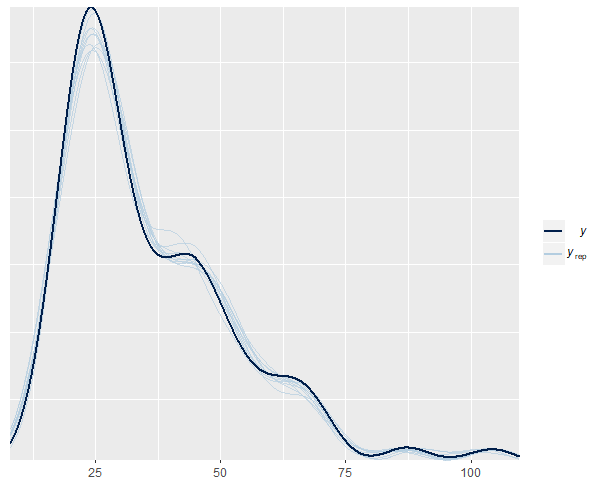


#BMI model#

R>bmi.final <- brm (BMI ~ age_cent_4yr + age_cent_4yr_2 + age_cent_4yr_3 + (age_cent_4yr | id) + (1 | antipychotics_cat2),

data = asd,

family = gaussian,

prior = c (prior (normal (18.6,50), class=Intercept),

prior (normal (0,10), class = b),

prior (cauchy(0,2), class = sd)),

control = list (adapt_delta = 0.99, max_treedepth = 15))

R>summary(bmi.final)

Family: gaussian(identity)

Formula: BMI ~ age_cent_4yr + age_cent_4yr_2 + age_cent_4yr_3 + (age_cent_4yr | id) + (1 | antipychotics_cat2)

Data: asd (Number of observations: 359)

Samples: 4 chains, each with iter = 2000; warmup = 1000; thin = 1;

total post-warmup samples = 4000

ICs: LOO = NA; WAIC = NA; R2 = NA

Group-Level Effects:

~ antipychotics_cat2 (Number of levels: 4)

Estimate Est.Error l-95% CI u-95% CI Eff.Sample Rhat

sd(Intercept) 1.97 1.46 0.15 5.59 619 1.00

~id (Number of levels: 120)

Estimate Est.Error l-95% CI u-95% CI Eff.Sample Rhat

sd(Intercept) 10.04 0.82 8.54 11.72 872 1.00

sd(age_cent_4yr) 0.63 0.12 0.41 0.87 531 1.01

cor(Intercept,age_cent_4yr) -0.89 0.06 -0.99 -0.76 380 1.01

Population-Level Effects:

Estimate Est.Error l-95% CI u-95% CI Eff.Sample Rhat

Intercept 26.94 1.72 23.35 30.05 1055 1.00

age_cent_4yr -3.10 0.36 -3.83 -2.40 4000 1.00

age_cent_4yr_2 0.43 0.08 0.28 0.59 4000 1.00

age_cent_4yr_3 -0.02 0.01 -0.03 -0.01 4000 1.00

Family Specific Parameters:

Estimate Est.Error l-95% CI u-95% CI Eff.Sample Rhat

sigma 1.81 0.10 1.61 2.02 762 1.01

Samples were drawn using sampling(NUTS). For each parameter, Eff.Sample is a crude measure of effective sample size, and Rhat is the potential scale reduction factor on split chains (at convergence, Rhat = 1).

R>plot(bmi.final)


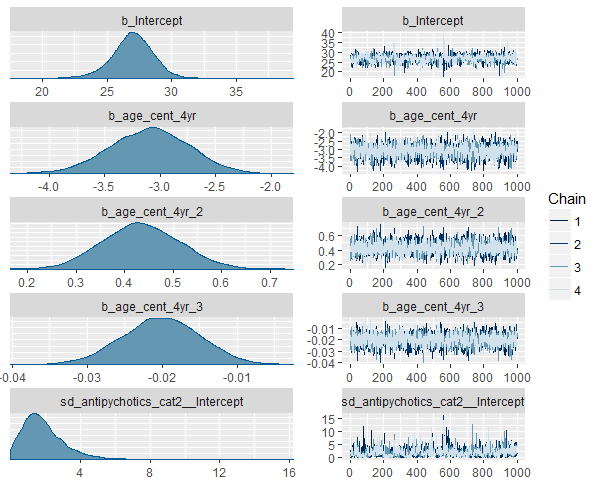


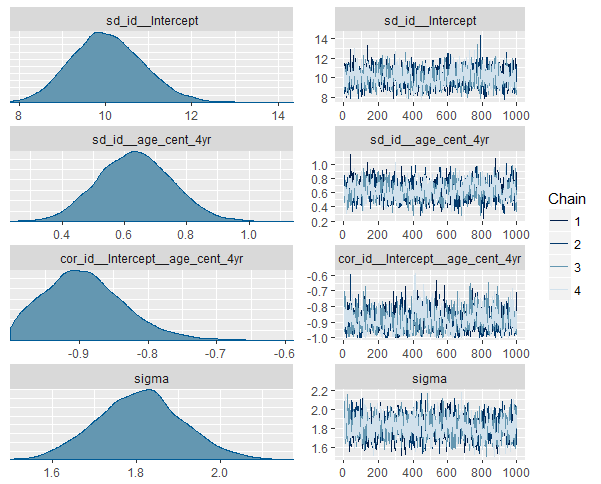


pp_check(bmi.final)


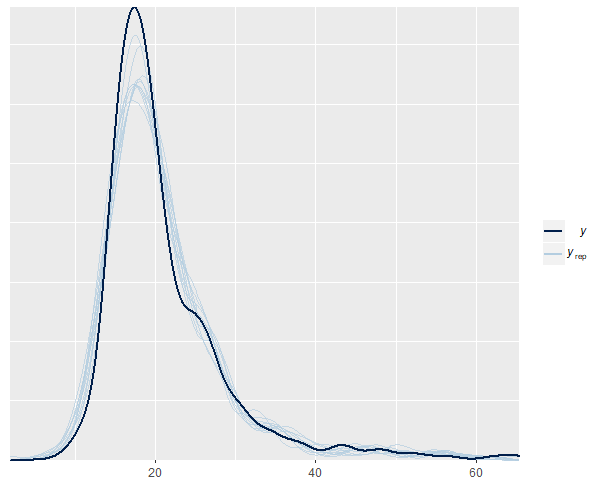


**Referências**

1. Burkner P-C. brms: An R Package for Bayesian Multilevel Models using Stan. J Stat Softw. 2017;80:1-28.

2. Bates B, Mächler M, Bolker B, Walker S. lme4: Linear mixed-effects models using Eigen and S4. 2014. <http://arxiv.org/abs/1406.5823>.

3. Gabry J. bayesplot: Plotting for Bayesian Models. 2016. <http://mc-stan.org/>.

4. Gelman A, Hwang J, Vehtari A. Understanding predictive information criteria for Bayesian models. Statistics and Computing.2014;24:997-1016.

5. Gelman A, Carlin JB, Stern HS, Dunson DB, Vehtari A, Rubin DB. Bayesian Data Analysis, Third Edition*.* Boca Raton, FL: Chapman & Hall/CRC Press; 2013.
